# Supplementary material for: Hydroxychloroquine; Why It Might Be Successful and Why It Might Not Be Successful in the Treatment of Covid-19 Pneumonia? Could It Be A Prophylactic Drug?
Source: Preprints.org preprint supplement (doi:10.20944/preprints202004.0348.v2), 2020-04-21
Supplement: Supplementary file 1 [file supplementary]

Figure: Schematic representation of Covid-19 pneumonia; hypothetical pneumonic involvement varying in severity (from limited to extended disease) and HCQ therapy. Reduced perfusion, somewhat distorted architecture of lung tissue, edema and gradual accumulation of HCQ in lung tissue might reduce HCQ delivery and HCQ concentrations in the pneumonic areas. The more involvement of the lung might be the more reduced HCQ concentration. (Each circle represents HCQ, colored areas indicate pneumonic involvement)
